# Supplementary material
Source: Springer Nature journal article supplement (https://www.springermedizin.de/resource/supplementary/12995_2008_95_MOESM2_ESM.pdf/9622730)

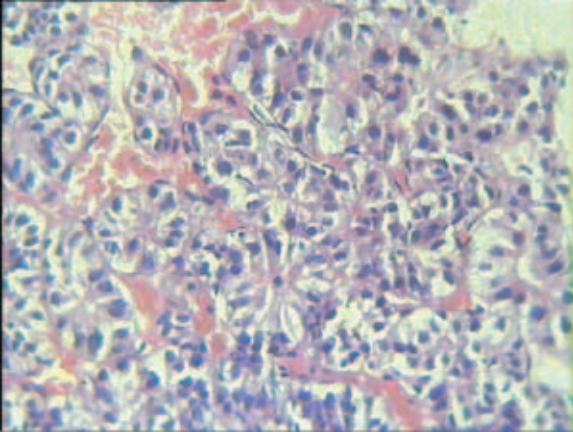

Supplement: MOESM2 [file 9622730]
